# Supplementary material for: Synthesis of chiral-at-metal rhodium complexes from achiral tripodal tetradentate ligands: resolution and application to enantioselective Diels–Alder and 1,3-dipolar cycloadditions
Source: Royal Society of Chemistry journal article supplement (doi:10.1039/d2ra06982b), 2022-01-01
Supplement: d2ra06982b1.pdf [file d2ra06982b1.pdf]

## Electronic supplementary information

### Synthesis of Chiral-at-Metal Rhodium Complexes from Achiral Tripodal Tetradentate Ligands: Resolution and Application to Enantioselective Diels-Alder and 1,3-Dipolar Cycloadditions

Alvaro G. Tejero,<sup>a</sup> María Carmona,<sup>a</sup> Ricardo Rodríguez,<sup>a,\*</sup> Fernando Viguri,<sup>a,\*</sup> Fernando J. Lahoz,<sup>a</sup> Pilar García-Orduña,<sup>a</sup> and Daniel Carmona<sup>a,\*</sup>

<sup>a</sup> Departamento de Catálisis y Procesos Catalíticos. Instituto de Síntesis Química y Catálisis Homogénea (ISQCH), CSIC - Universidad de Zaragoza. Pedro Cerbuna 12, 50009 Zaragoza, Spain

E-mail: [dcarmona@unizar.es](mailto:dcarmona@unizar.es); [riromar@unizar.es](mailto:riromar@unizar.es); [fviguri@unizar.es](mailto:fviguri@unizar.es)

#### Table of Contents

|                                                                                                                                                                                                                                                        |            |
|--------------------------------------------------------------------------------------------------------------------------------------------------------------------------------------------------------------------------------------------------------|------------|
| <b>1. <sup>1</sup>H, <sup>31</sup>P{<sup>1</sup>H}, <sup>19</sup>F{<sup>1</sup>H} and <sup>13</sup>C{<sup>1</sup>H} spectra for the complexes 2, 3 and (C<sub>Rh</sub>,R<sub>N</sub>,S<sub>C</sub>)/(A<sub>Rh</sub>,S<sub>N</sub>,S<sub>C</sub>)-4</b> | <b>S2</b>  |
| <b>2. HPLC chromatograms</b>                                                                                                                                                                                                                           | <b>S9</b>  |
| <b>3. Structural characterization of complex 2 (X-ray crystallography)</b>                                                                                                                                                                             | <b>S11</b> |
| <b>4. References</b>                                                                                                                                                                                                                                   | <b>S12</b> |

1.  $^1\text{H}$ ,  $^{31}\text{P}\{^1\text{H}\}$ ,  $^{19}\text{F}\{^1\text{H}\}$  and  $^{13}\text{C}\{^1\text{H}\}$  spectra for the complexes 2, 3 and  $(C_{Rh}, R_N, S_C)/(A_{Rh}, S_N, S_C)-4$

Figure S1.  $^1\text{H}$  NMR ( $\text{CD}_2\text{Cl}_2/\text{acetone-d}_6$ , RT) spectrum of 2

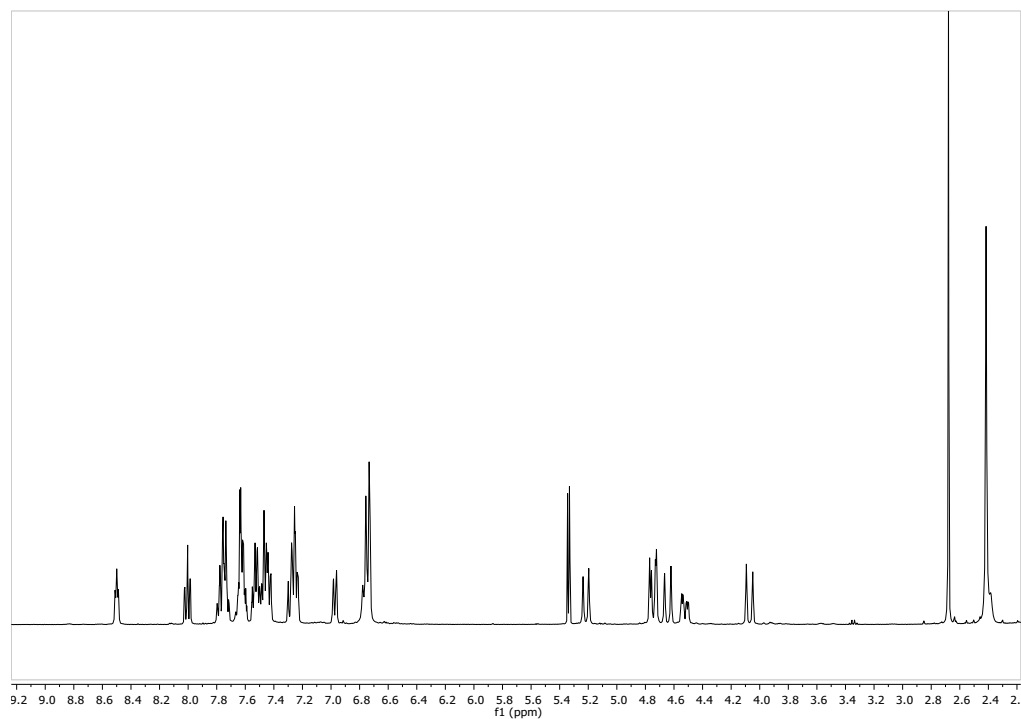

Figure S2.  $^{31}\text{P}\{^1\text{H}\}$  ( $\text{CD}_2\text{Cl}_2/\text{acetone-d}_6$ , RT) spectrum of 2

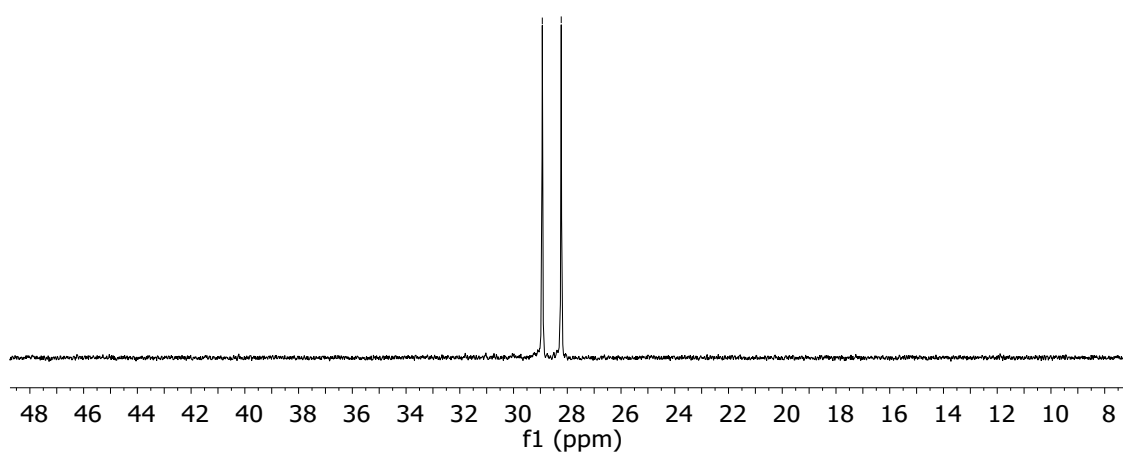

Figure S3.  $^{19}\text{F}\{^1\text{H}\}$  ( $\text{CD}_2\text{Cl}_2/\text{acetone-d}_6$ , RT) spectrum of 2

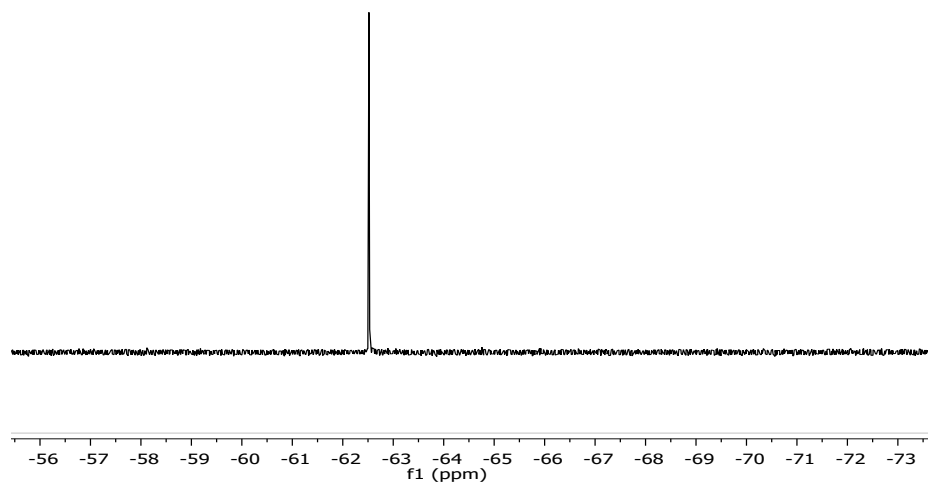

Figure S4.  $^{13}\text{C}\{^1\text{H}\}$  ( $\text{CD}_2\text{Cl}_2/\text{acetone-d}_6$ , RT) spectrum of 2

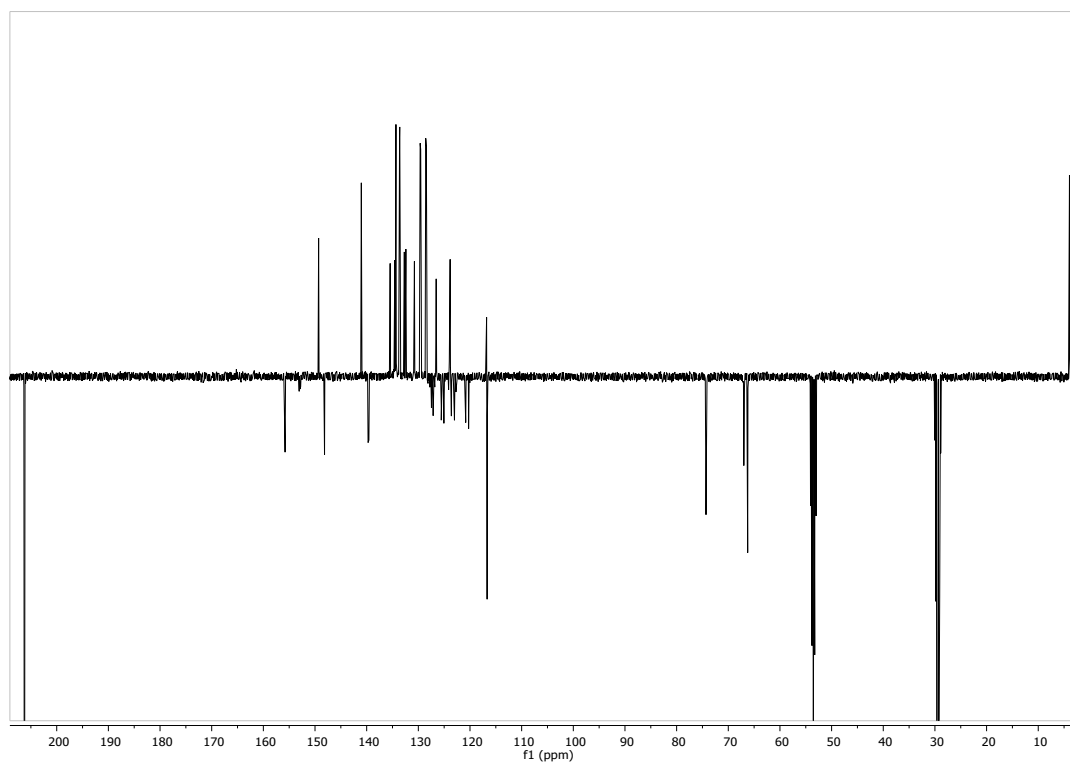

**Figure S5.**  $^1\text{H}$  NMR ( $\text{CD}_2\text{Cl}_2$ , RT) spectrum of **3**

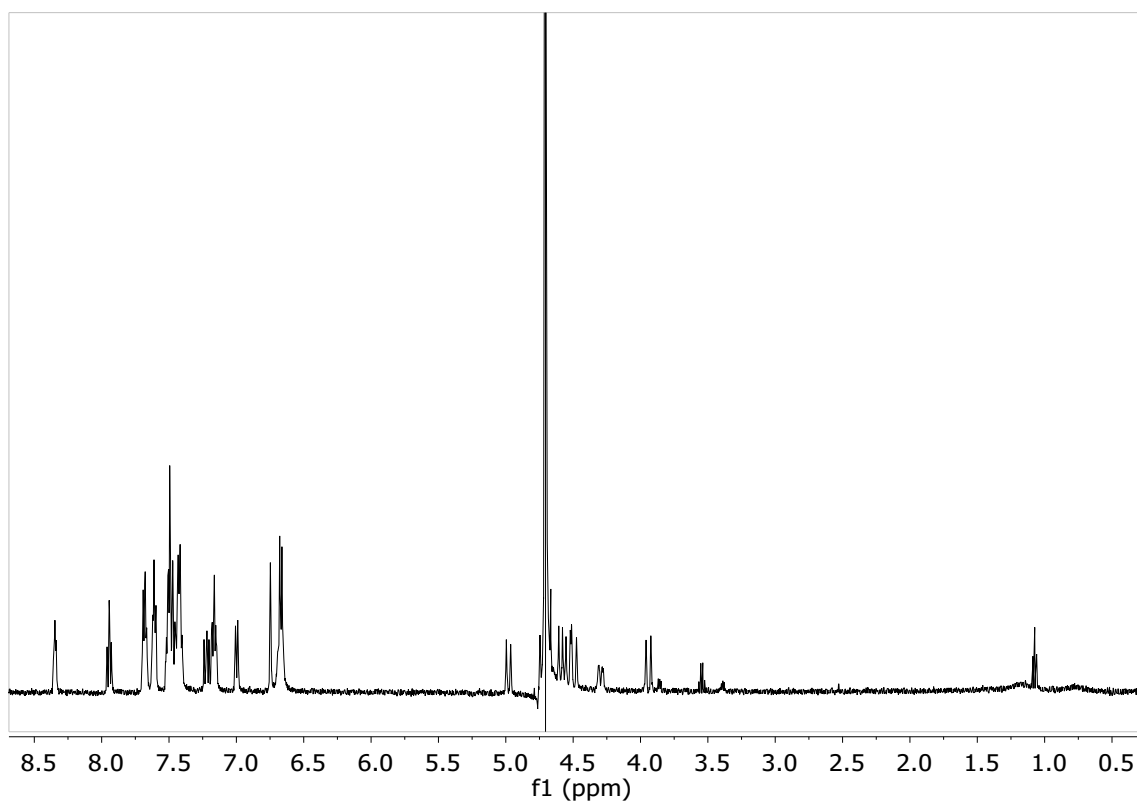

**Figure S6.**  $^{31}\text{P}\{^1\text{H}\}$  ( $\text{CD}_2\text{Cl}_2$ , RT) spectrum of **3**

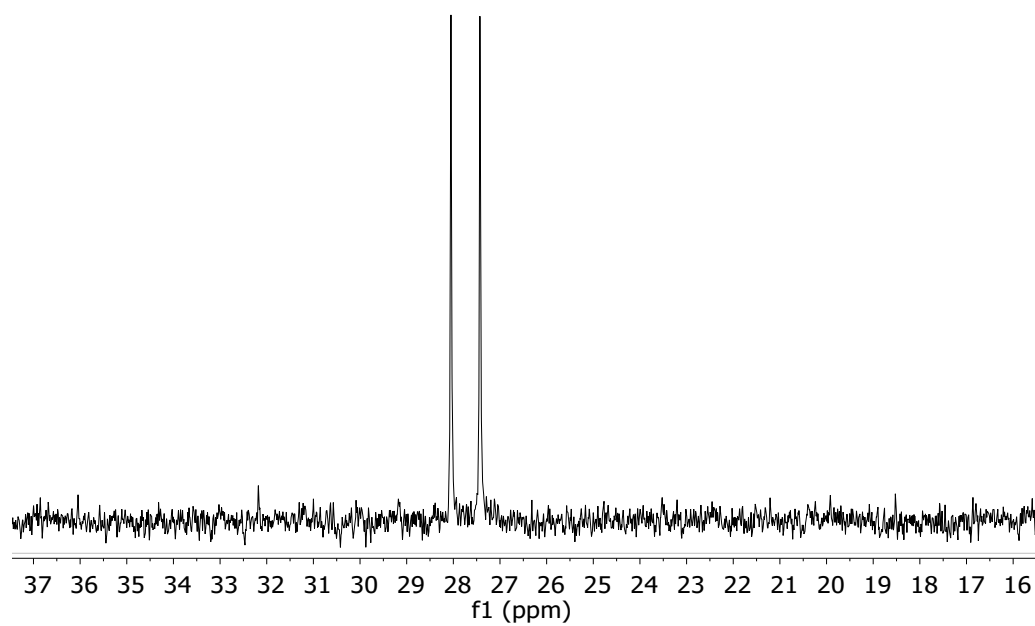

Figure S7.  $^{19}\text{F}\{^1\text{H}\}$  ( $\text{CD}_2\text{Cl}_2$ , RT) spectrum of 3

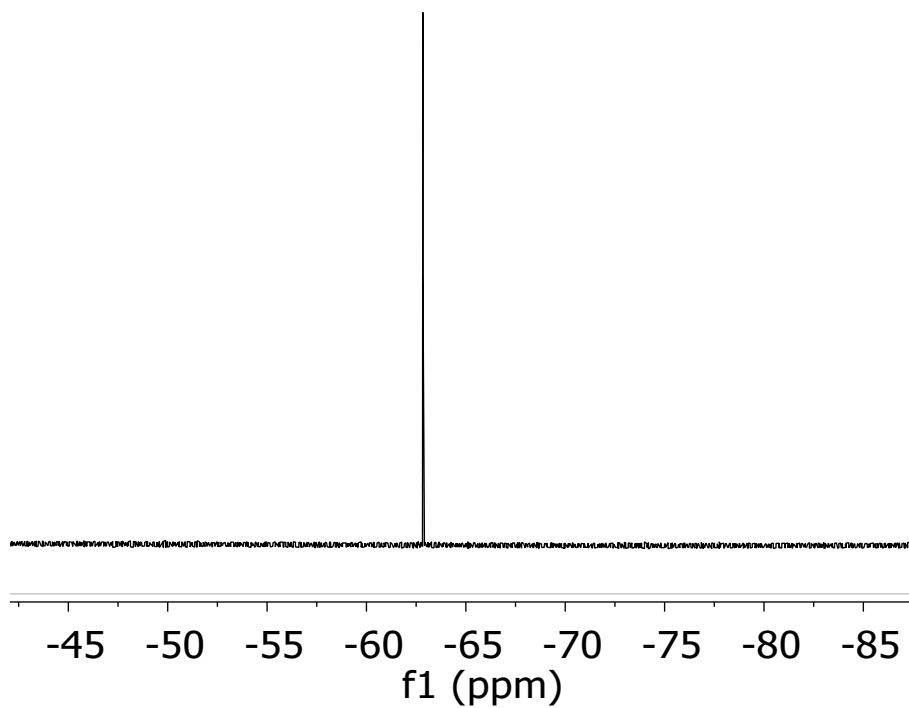

Figure S8.  $^{13}\text{C}\{^1\text{H}\}$  ( $\text{CD}_2\text{Cl}_2$ , RT) spectrum of 3

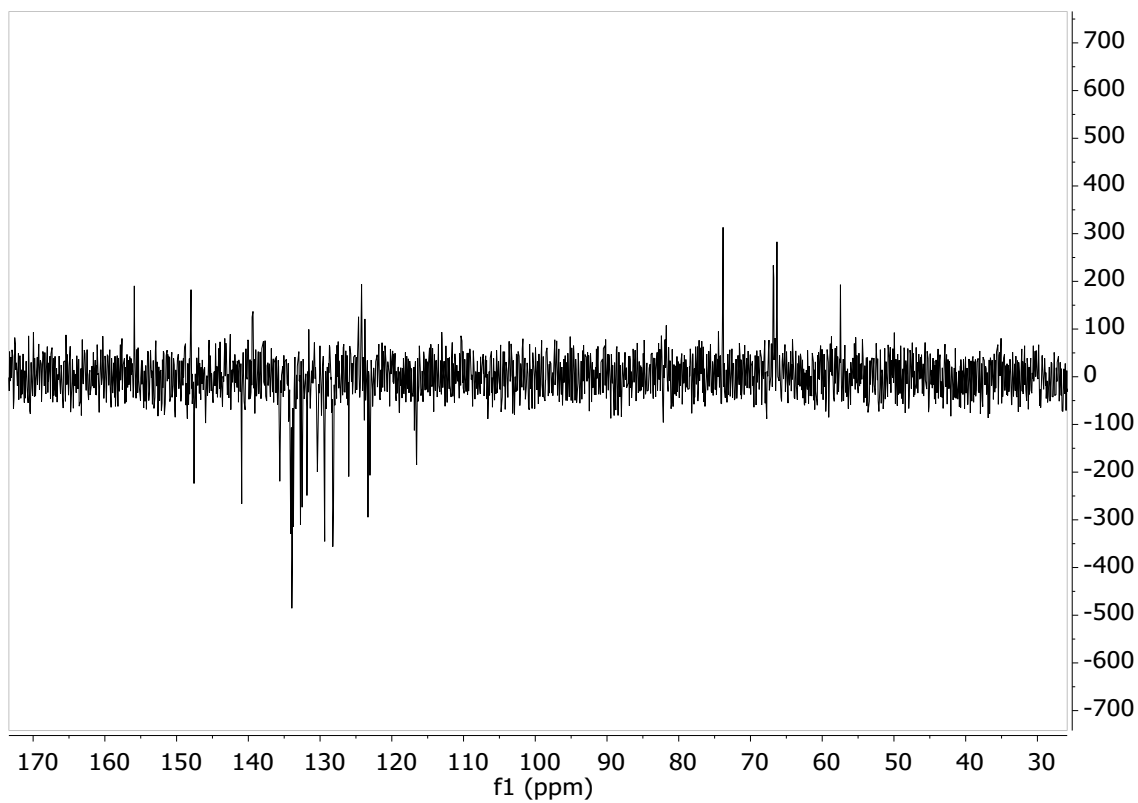

**Figure S9.**  $^1\text{H}$  NMR ( $\text{CD}_2\text{Cl}_2$ , RT) spectrum of  $(C_{\text{Rh}}, R_{\text{N}}, S_{\text{C}})/(A_{\text{Rh}}, S_{\text{N}}, S_{\text{C}})$ -4

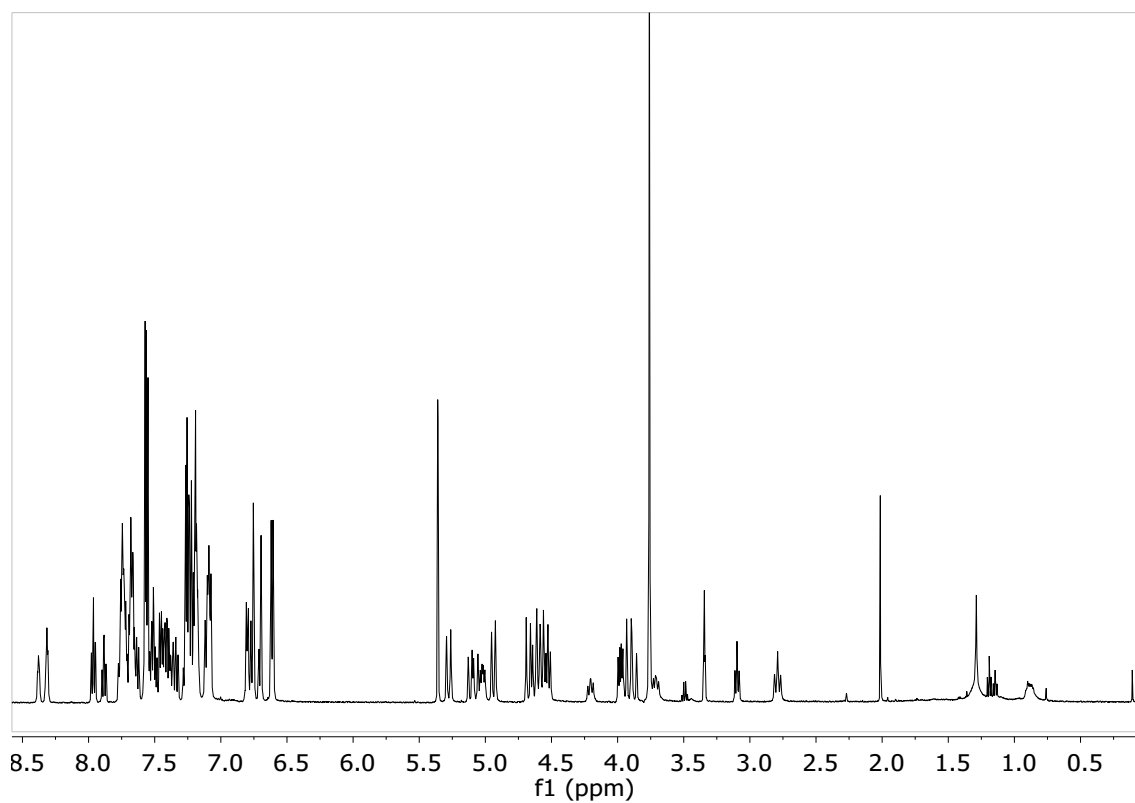

**Figure S10.**  $^{31}\text{P}\{^1\text{H}\}$  ( $\text{CD}_2\text{Cl}_2$ , RT) spectrum of  $(C_{\text{Rh}}, R_{\text{N}}, S_{\text{C}})/(A_{\text{Rh}}, S_{\text{N}}, S_{\text{C}})$ -4

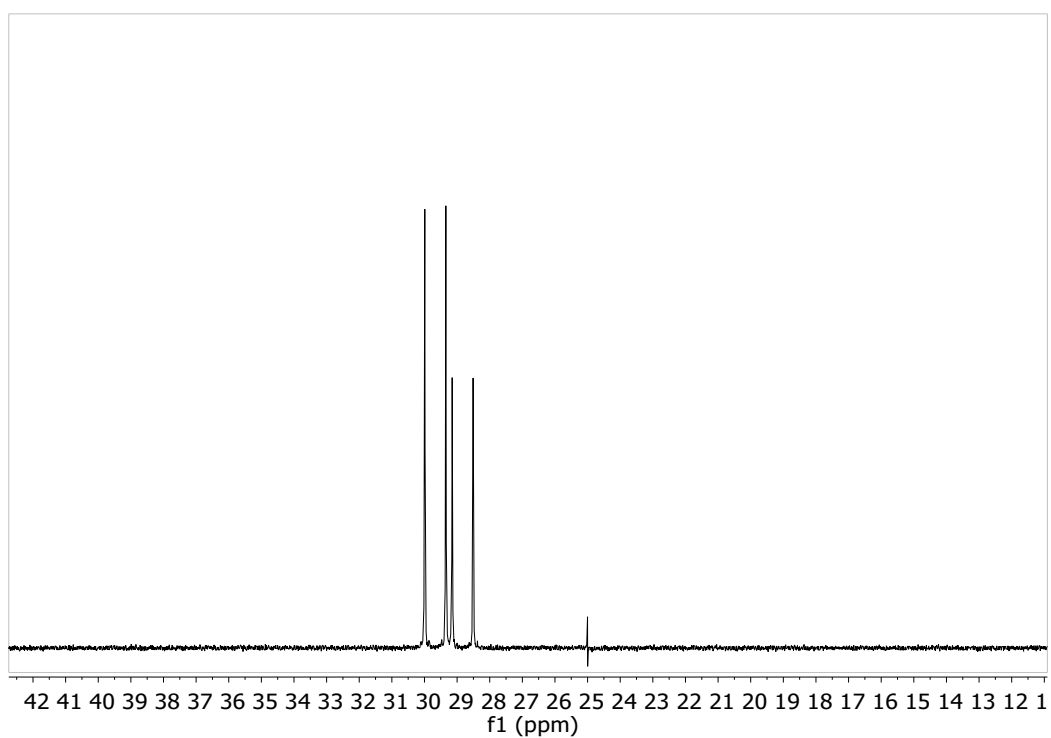

**Figure S11.**  $^{19}\text{F}\{^1\text{H}\}$  ( $\text{CD}_2\text{Cl}_2$ , RT) spectrum of  $(C_{\text{Rh}}, R_{\text{N}}, S_{\text{C}})/(A_{\text{Rh}}, S_{\text{N}}, S_{\text{C}})$ -4

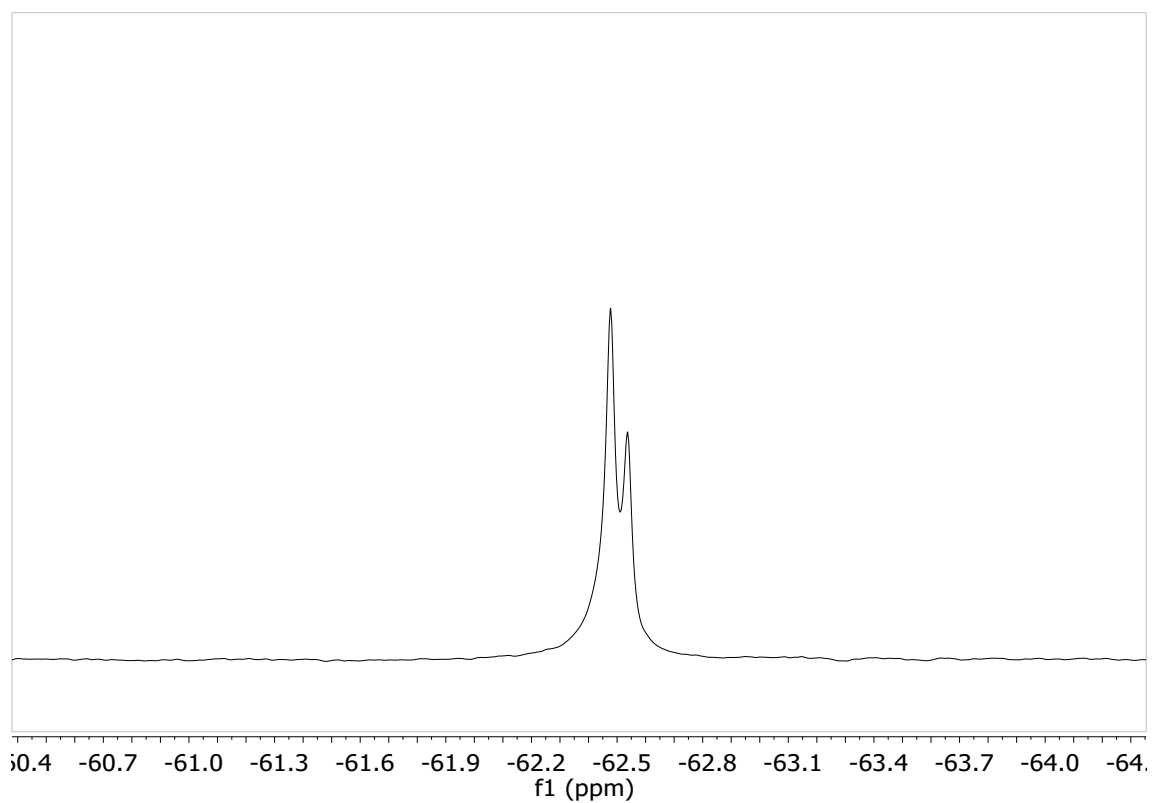

**Figure S12.**  $^{13}\text{C}\{^1\text{H}\}$  ( $\text{CD}_2\text{Cl}_2$ , RT) spectrum of  $(C_{\text{Rh}}, R_{\text{N}}, S_{\text{C}})/(A_{\text{Rh}}, S_{\text{N}}, S_{\text{C}})$ -4

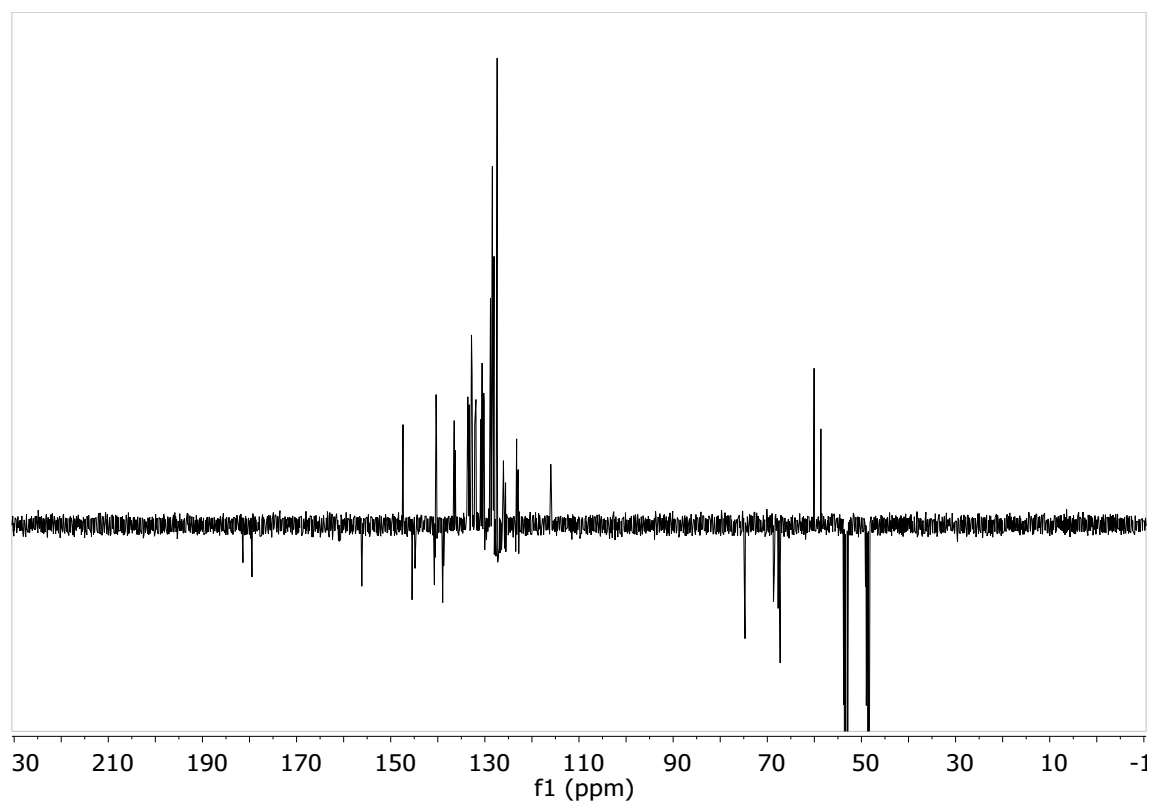

**Figure S13.** NOESY  $^1\text{H}$ - $^1\text{H}$  ( $\text{CD}_2\text{Cl}_2$ , RT) and HMBC  $^{31}\text{P}$ - $^1\text{H}$  ( $\text{CD}_2\text{Cl}_2$ , RT) experiments of  $(C_{\text{Rh}}, R_{\text{N}}, S_{\text{C}})/(A_{\text{Rh}}, S_{\text{N}}, S_{\text{C}})$ -4

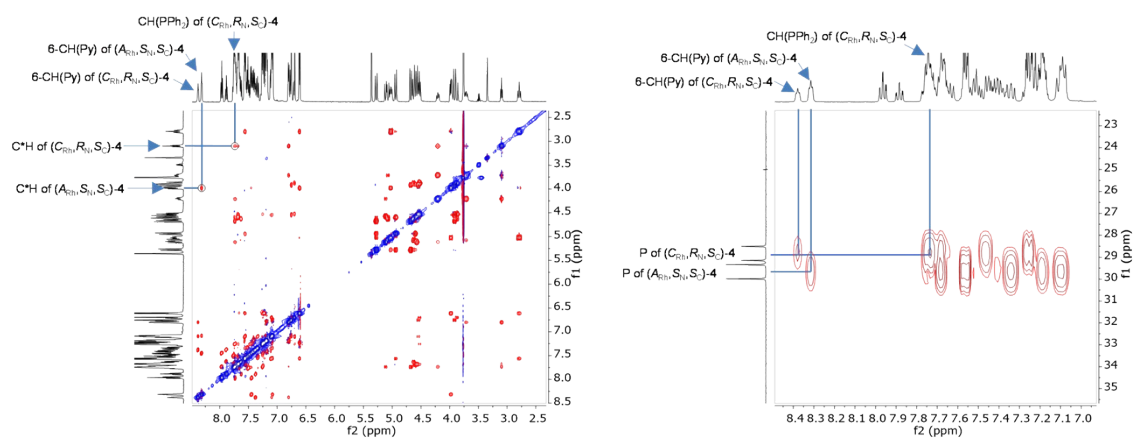



## 2. HPLC chromatograms

Figure S14. HPLC chromatogram for *rac-2*

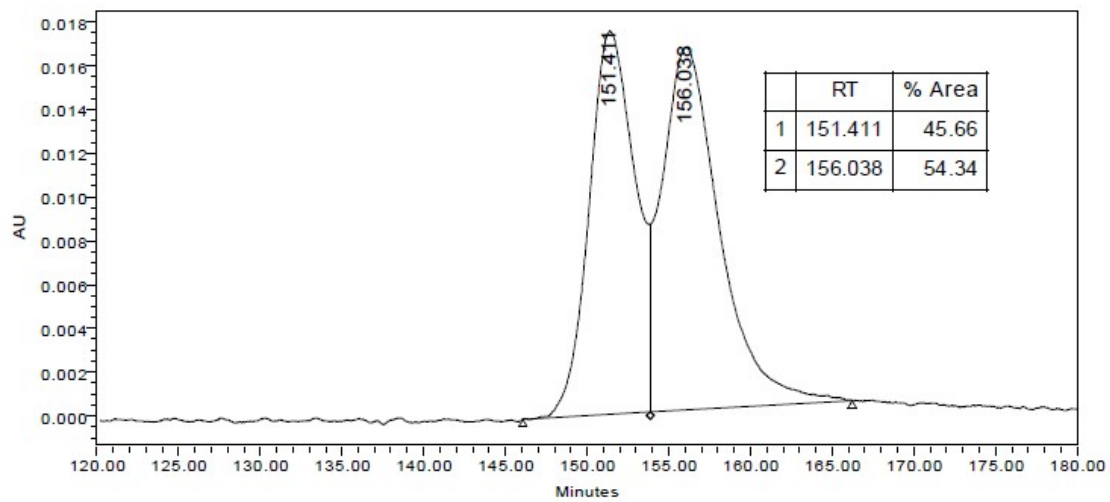

Figure S15. HPLC chromatogram for (*A*<sub>Rh</sub>,*R*<sub>N</sub>)-2

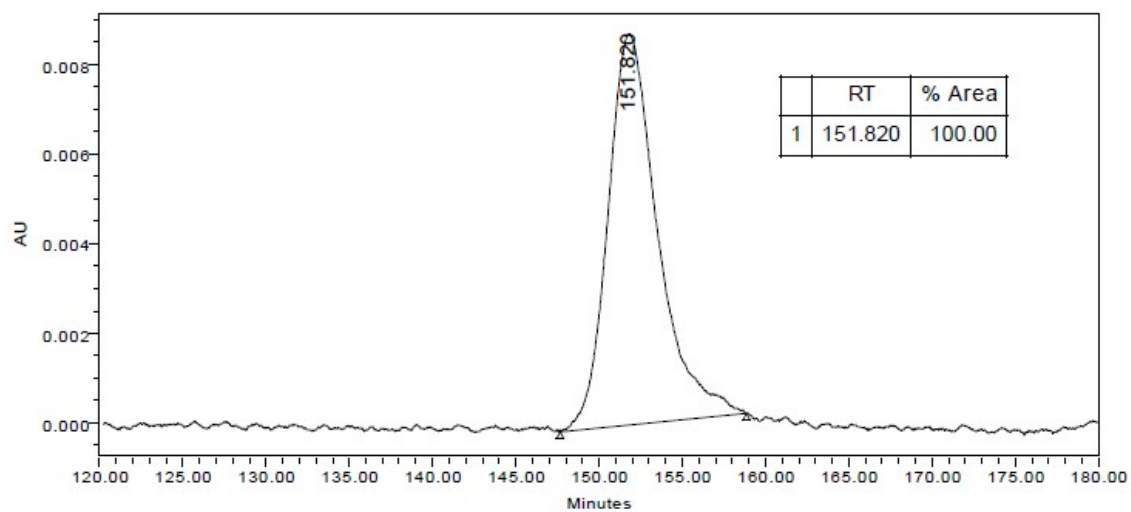

**Figure S16. HPLC chromatogram for (*A*<sub>Rh</sub>,*R*<sub>N</sub>)-2 after heating 48 h at 80 °C in MeOH**

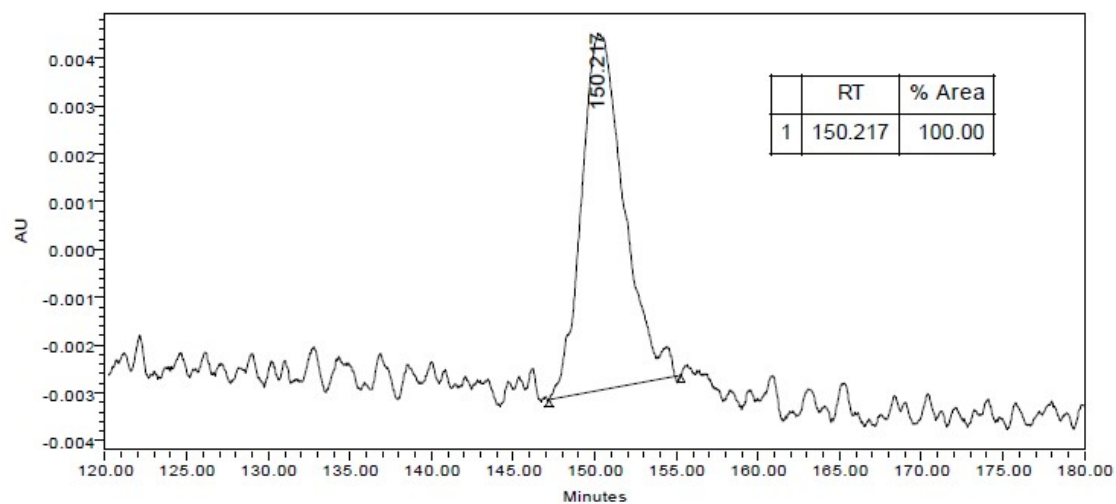

**Figure S17. HPLC chromatogram for (*C*<sub>Rh</sub>,*S*<sub>N</sub>)-2**

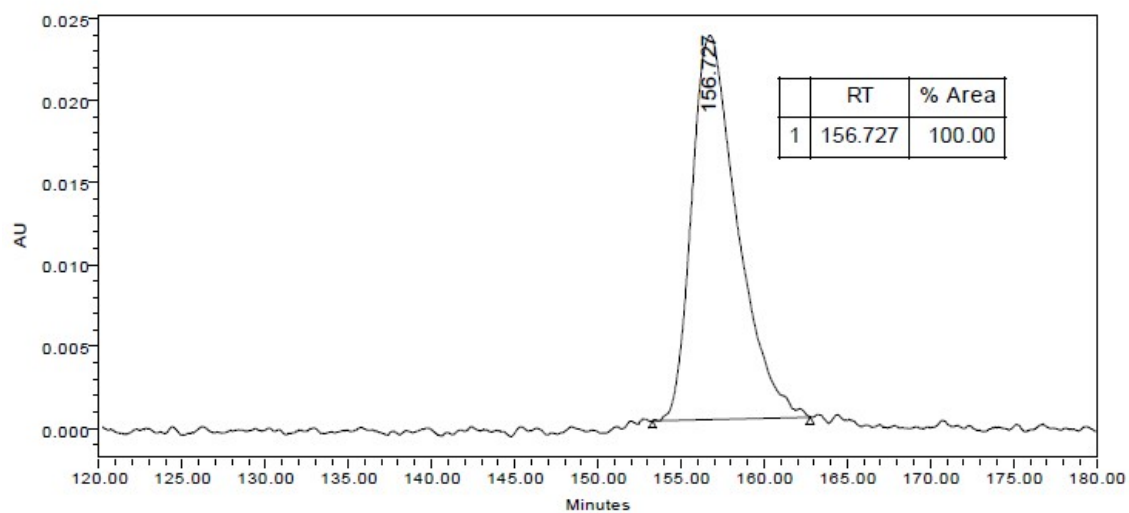

### 3. Structural characterization of the complex 2 (X-ray crystallography)

X-ray diffraction data were collected on APEX DUO Bruker diffractometer, using graphite-monochromated Mo  $\kappa\alpha$  radiation ( $\lambda = 0.71073 \text{ \AA}$ ). Selected crystal was mounted on a fiber, coated with a protecting perfluoropolyether oil and cooled to 100(2) K with an open-flow nitrogen gas. Data were collected using  $\omega$ -scans with narrow oscillation frame strategy ( $\Delta\omega = 0.3^\circ$ ). Data were integrated and corrected from absorption effects with SAINT<sup>S1</sup> and SADABS<sup>S2</sup> programs, included in APEX2 package. Crystal structures were solved by direct methods with SHELXS-2013<sup>S3</sup> and refined by full-matrix least squares on  $F^2$  with SHELXL program<sup>S4</sup> included in Wingx program system.<sup>S5</sup> Hydrogen atoms have been included in the model in calculated positions and refined with a riding model.

**Crystal data for complex 2:**  $\text{C}_{37}\text{H}_{33}\text{F}_{15}\text{N}_4\text{PRhSb}_2 \cdot 2(\text{CH}_2\text{Cl}_2)$ ;  $M_r = 1365.90$ ; colourless prism,  $0.070 \times 0.115 \times 0.200 \text{ mm}^3$ ; triclinic  $P\bar{1}$ ;  $a = 12.2805(9) \text{ \AA}$ ,  $b = 13.6365(9) \text{ \AA}$ ,  $c = 14.6021(10) \text{ \AA}$ ,  $\alpha = 96.0690(10)^\circ$ ,  $\beta = 102.032(2)^\circ$ ,  $\gamma = 92.269(2)^\circ$ ;  $V = 2373.4(3) \text{ \AA}^3$ ,  $Z = 2$ ,  $D_c = 1.911 \text{ g/cm}^3$ ;  $\mu = 1.826 \text{ cm}^{-1}$ ; min. and max. absorption correction factors: 0.7569 and 0.8373;  $2\theta_{\text{max}} = 58.374^\circ$ ; 32424 reflections measured, 12574 unique;  $R_{\text{int}} = 0.0436$ ; number of data/restraint/parameters 12574/0/597;  $R_1 = 0.0485$  [9063 reflections,  $I > 2\sigma(I)$ ],  $wR(F^2) = 0.1180$  (all data); largest difference peak  $2.977 \text{ e} \cdot \text{\AA}^{-3}$ .

#### 4. References

- S1 SAINT+, version 6.01: Area-Detector Integration Software, Bruker AXS, Madison, WI, 2001.
- S2 SADABS, Area Detector Absorption Program. Bruker AXS, Madison, WI, 1996; L. Krause, R. Herbst-Irmer, G. M. Sheldrick, D. Stalke, *J. Appl. Cryst.* 2015, **48**, 3-10.
- S3 G. M. Sheldrick. A short history of SHELX. *Acta Crystallogr.* 2008, **A64**, 112-122.
- S4 G. M. Sheldrick. Crystal structure refinement with SHELXL. *Acta Crystallogr.* 2015, **C71**, 3-8.
- S5 L. J. Farrugia. WinGX and ORTEP for Windows: an update. *J. Appl. Cryst.* 2012, **45**, 849-854.
